# Supplementary material for: Steel Slag as New Catalyst for the Synthesis of Fames from Soybean Oil
Source: MDPI journal article supplement (doi:10.3390/catal11050619), 2021-05-11
Supplement: s1 [file s1]

Archive with 1 entries (1 files):
- catalysts-1190903-supplementary.pdf
