# Supplementary material for: Steel Slag as New Catalyst for the Synthesis of Fames from Soybean Oil
Source: MDPI journal article supplement (doi:10.3390/catal11050619), 2021-05-11
Supplement: s1 [file s1 › catalysts-1190903-supplementary.pdf]

## *Supplementary Materials*

### **Table of Contents**

|                                                                                        |                 |
|----------------------------------------------------------------------------------------|-----------------|
| 1. B.E.T. analysis of pristine catalyst 1 after thermic treatment(S1)                  | <i>p.2</i>      |
| 2. Supplemental SEM images at 100 $\mu\text{m}$ of catalyst <b>1</b> (S2-S5)           | <i>p. 3-6</i>   |
| 3. Supplemental SEM images at 20 $\mu\text{m}$ of recycle of catalyst <b>1</b> (S6-S8) | <i>p. 7-9</i>   |
| 4. Supplemental EDX analysis of recycle of catalyst <b>1</b> (S9-S12)                  | <i>p. 10-13</i> |
| 5. Mapping images of catalyst and of recycle of catalyst <b>1</b> (S13-S19)            | <i>p. 14-18</i> |

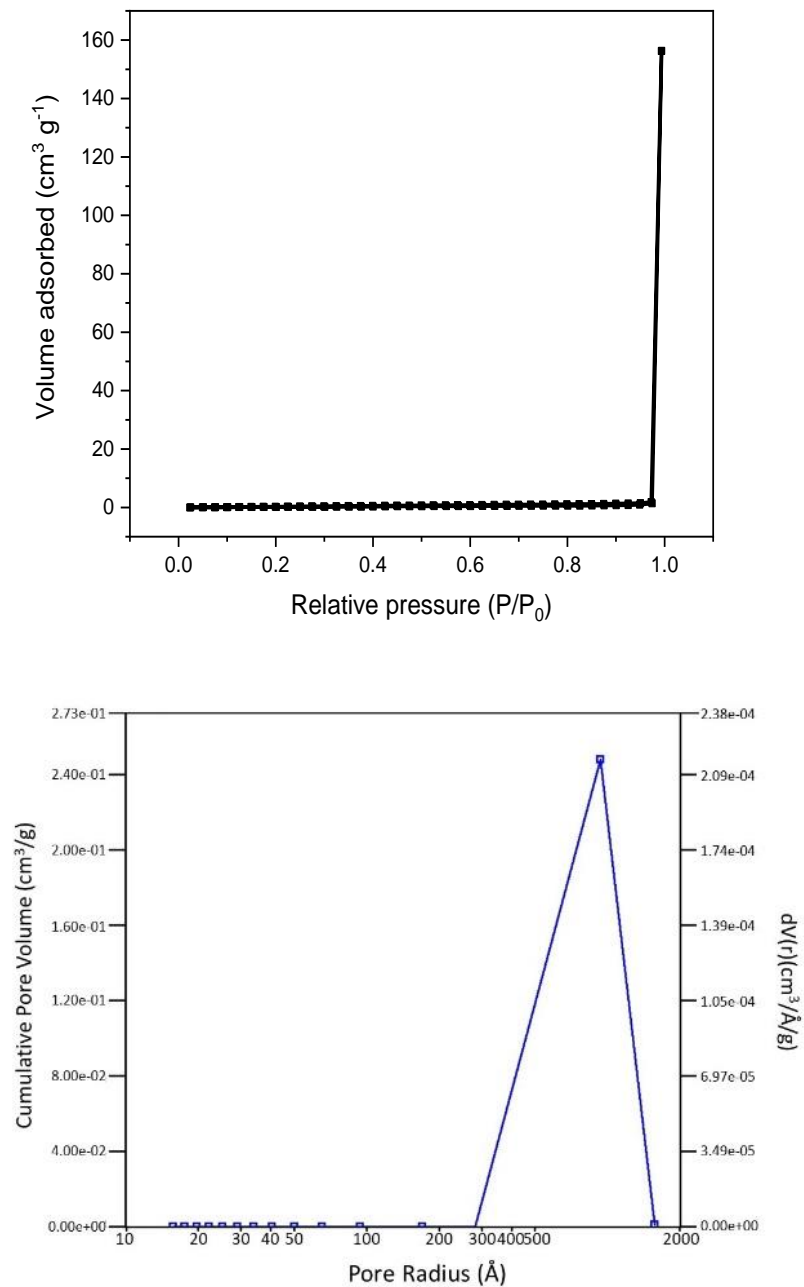

*Figure S1.* Isothermal data (top) and Pore size distribution (bottom) of pristine **1** after thermal treatment (400°C).

BET-BJH analyses:

Area =  $0.780 \pm 0.8$  m<sup>2</sup>/g; Pore surface = 5.323 m<sup>2</sup>/g; Pore volume = 0.248 cm<sup>3</sup>/g , Pore radius\* = Dv(r) 932.335 Å

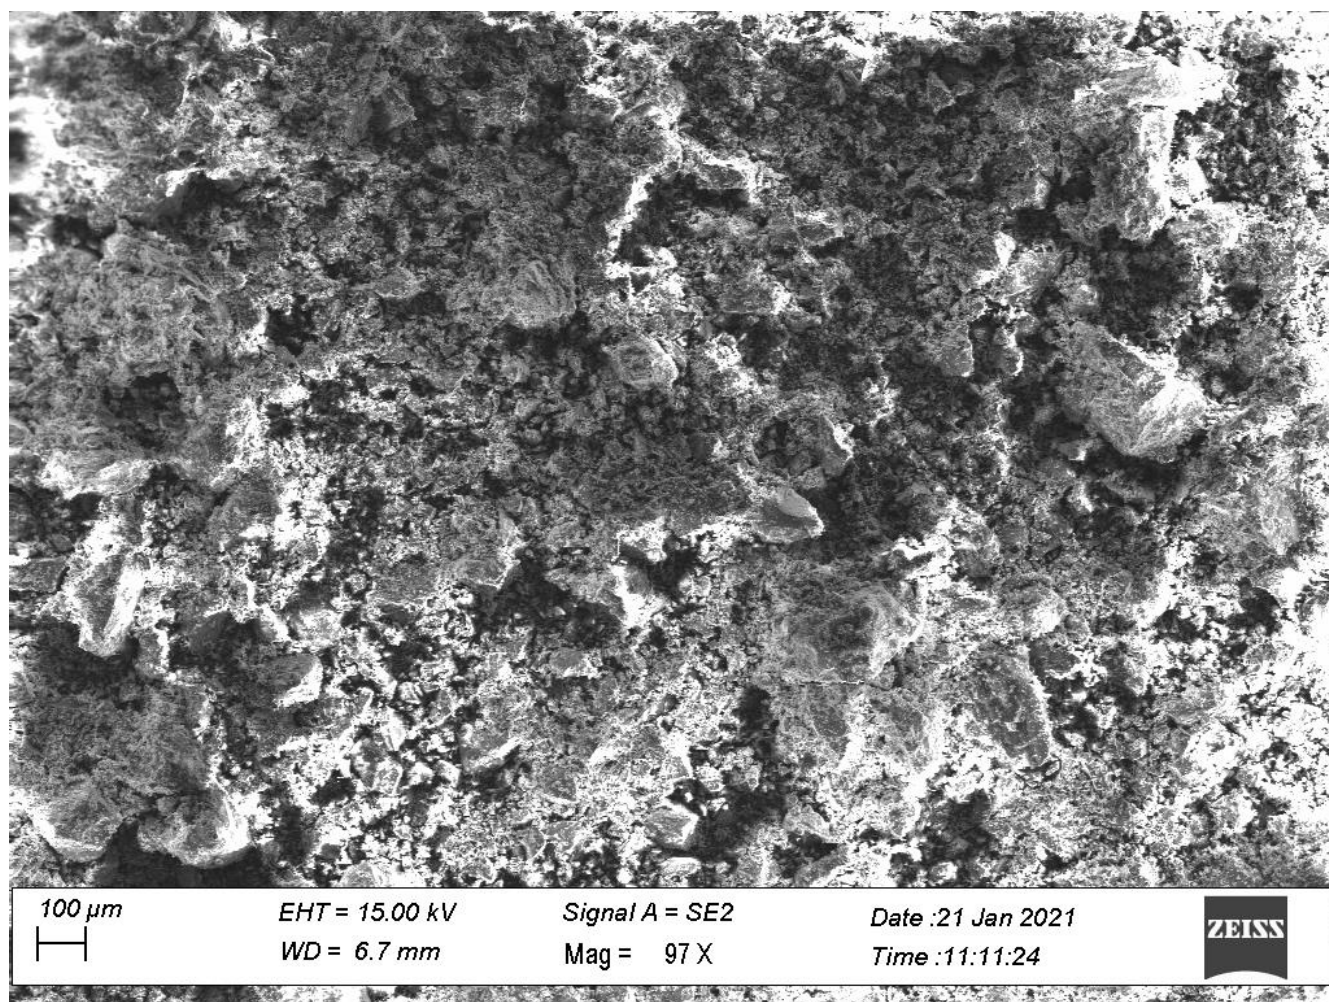

*Figure S2. SEM image 100  $\mu\text{m}$  of catalyst 1*

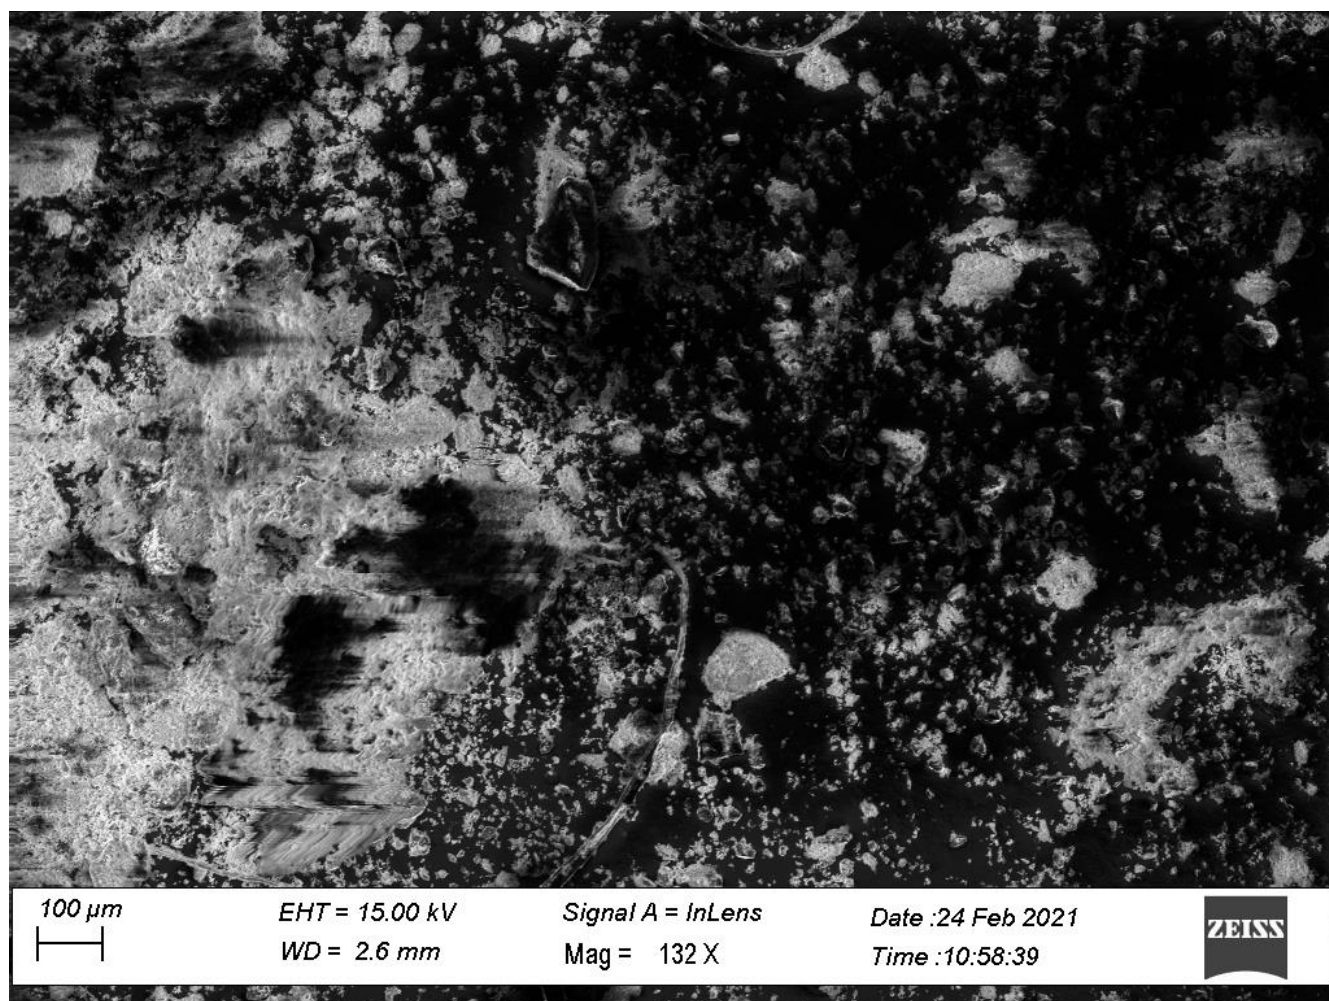

*Figure S3. SEM image 100  $\mu\text{m}$  of catalyst 1 after fourth cycle*

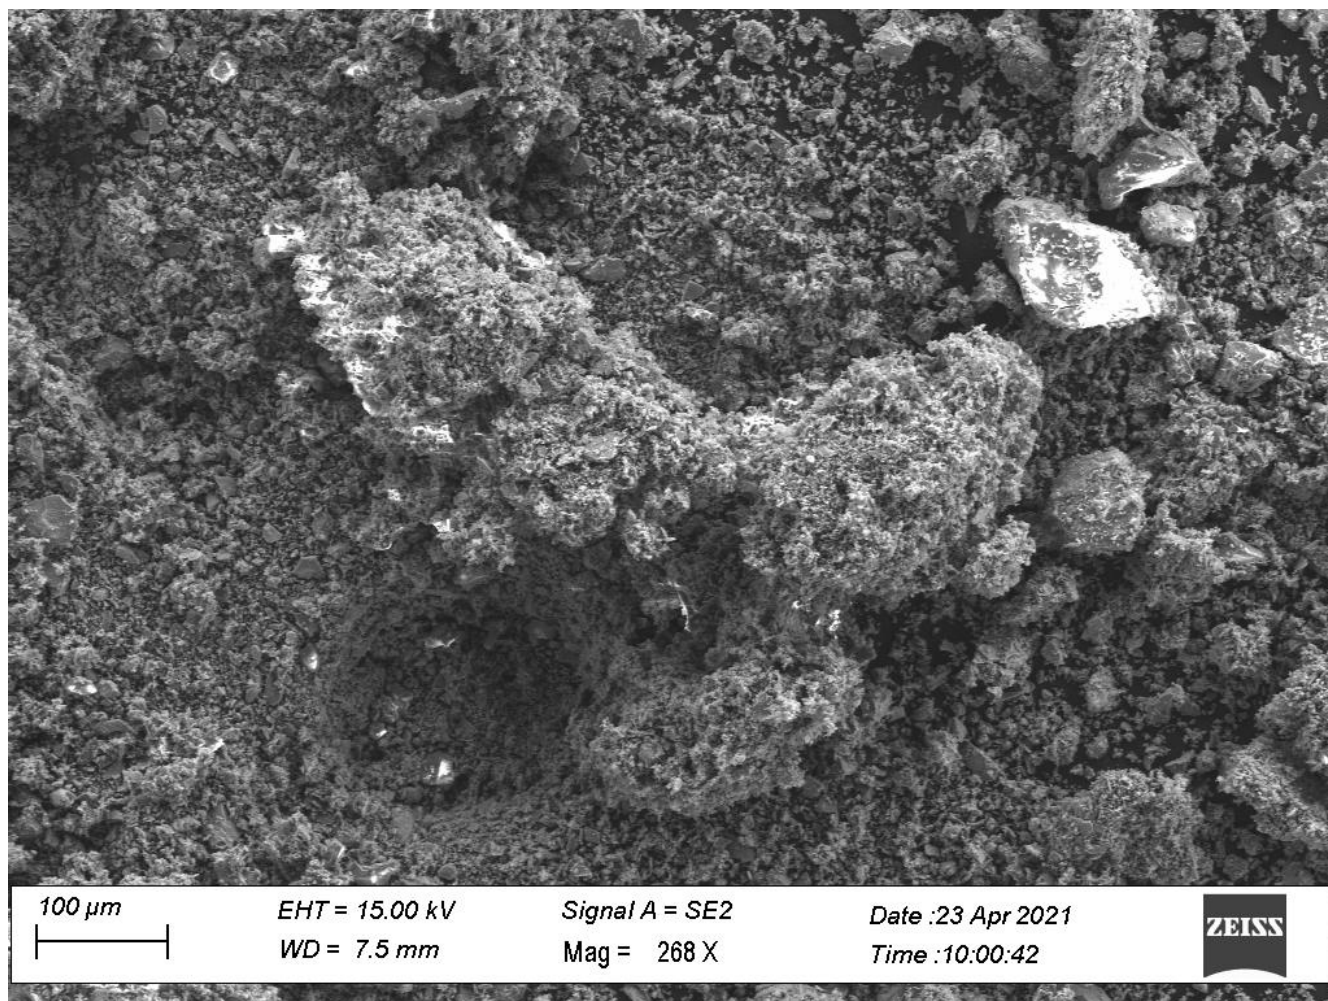

*Figure S4. SEM image 100 μm of catalyst I after fourth cycle and thermic treatment at 400°C*

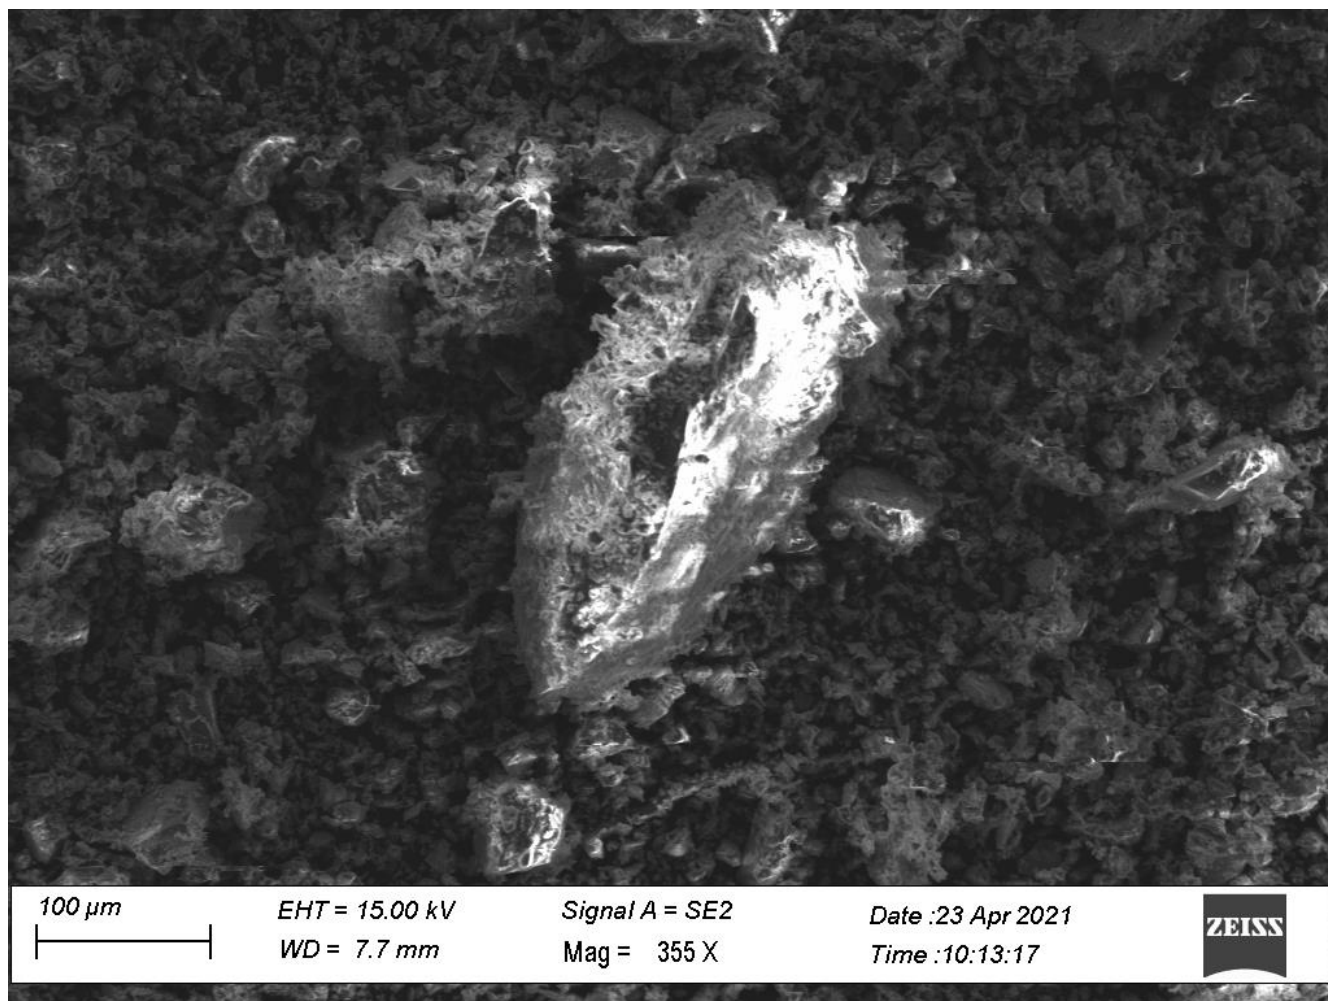

*Figure S5. SEM image 100 μm of pristine catalyst **1** after thermic treatment at 400°C*

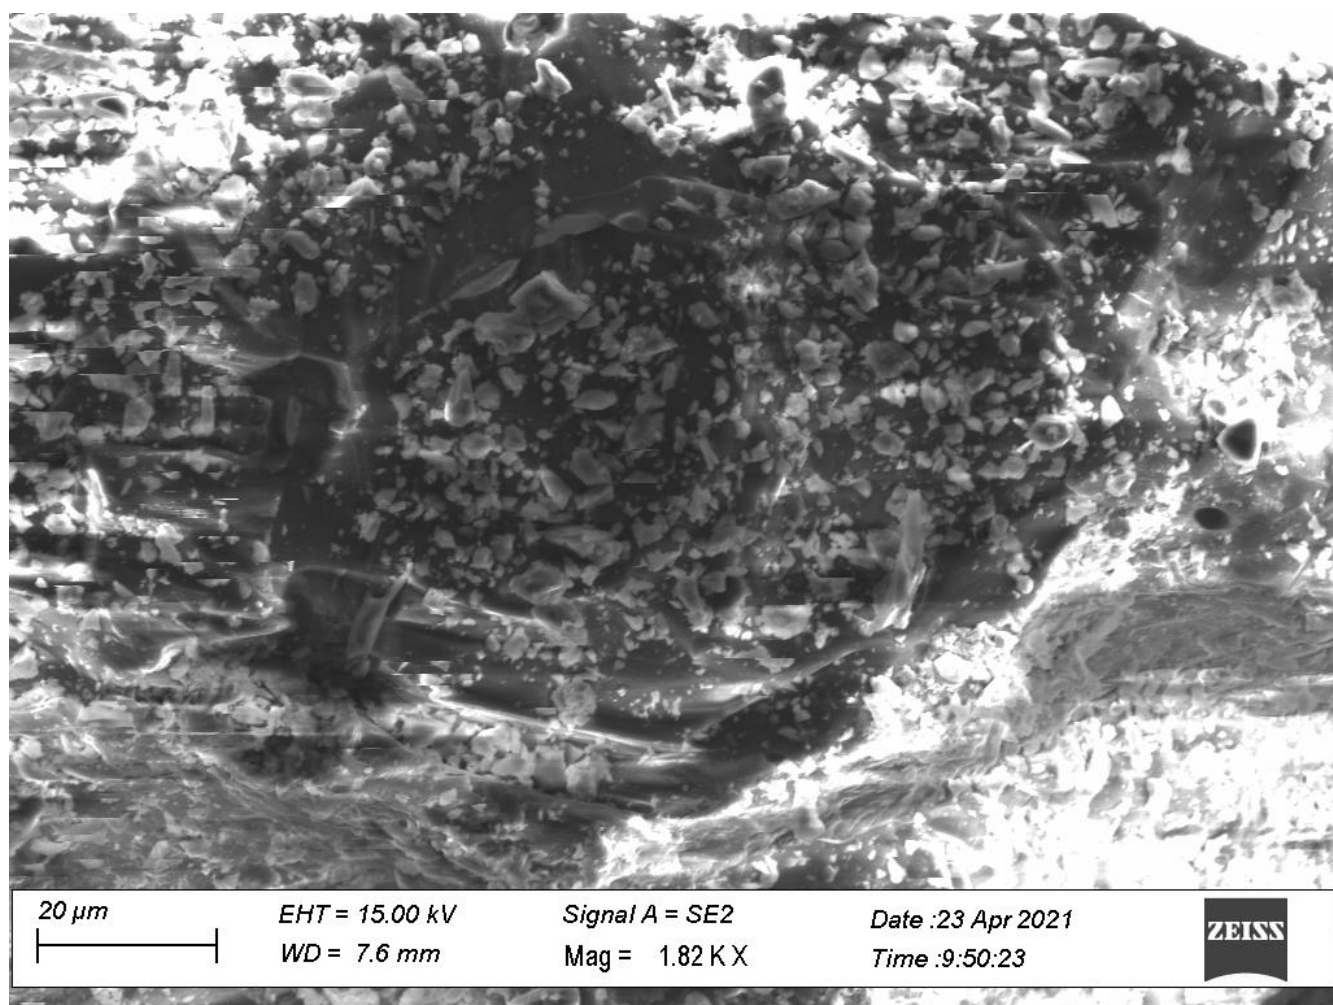

*Figure S6. SEM image 20  $\mu\text{m}$  of catalyst **1** after first cycle*

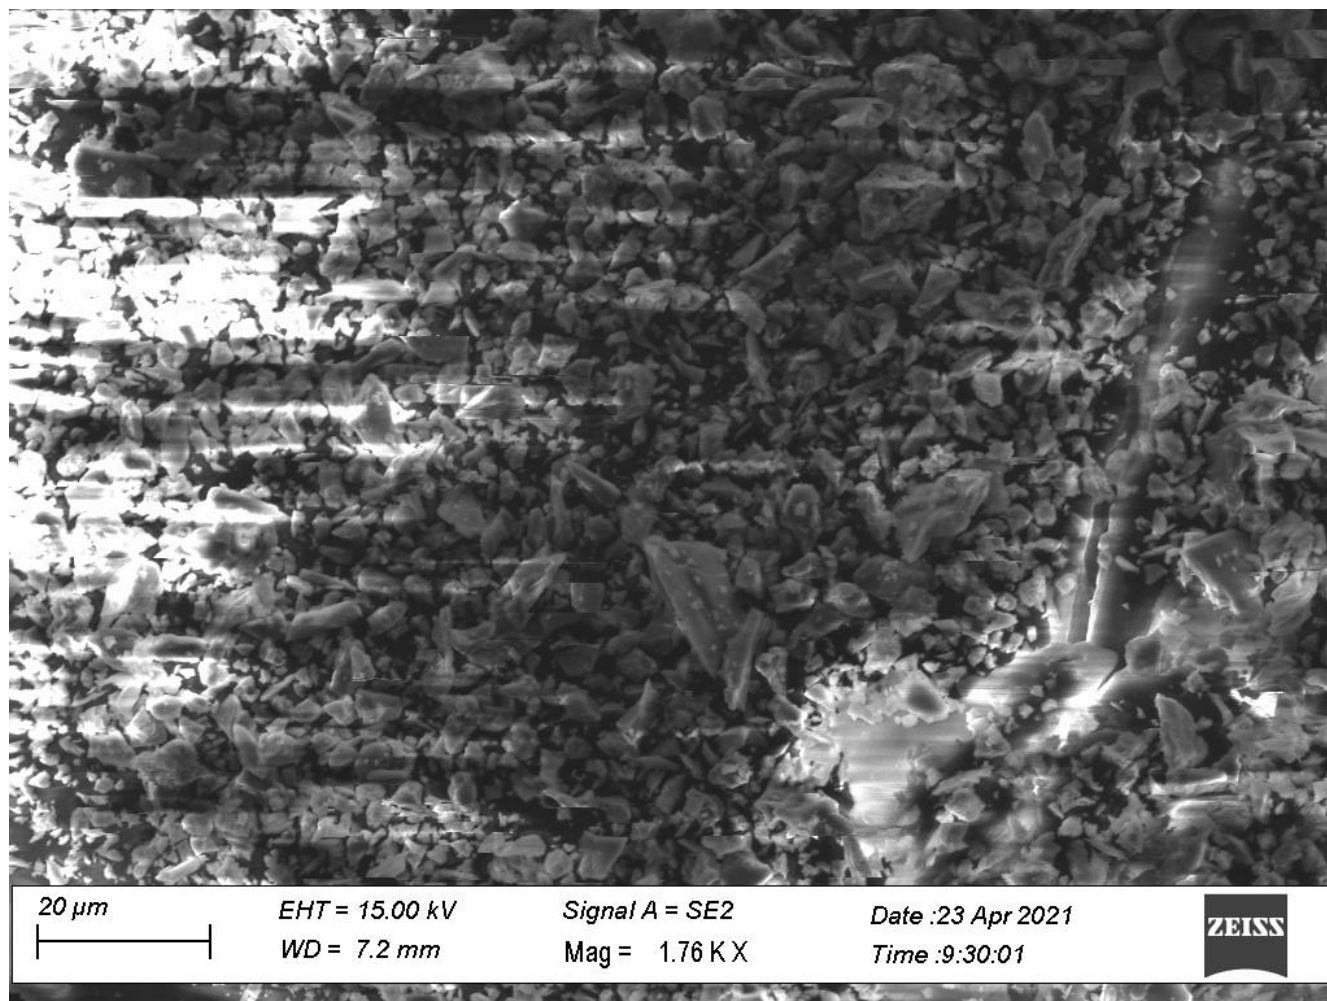

*Figure S7. SEM image 20  $\mu\text{m}$  of catalyst 1 after second cycle*

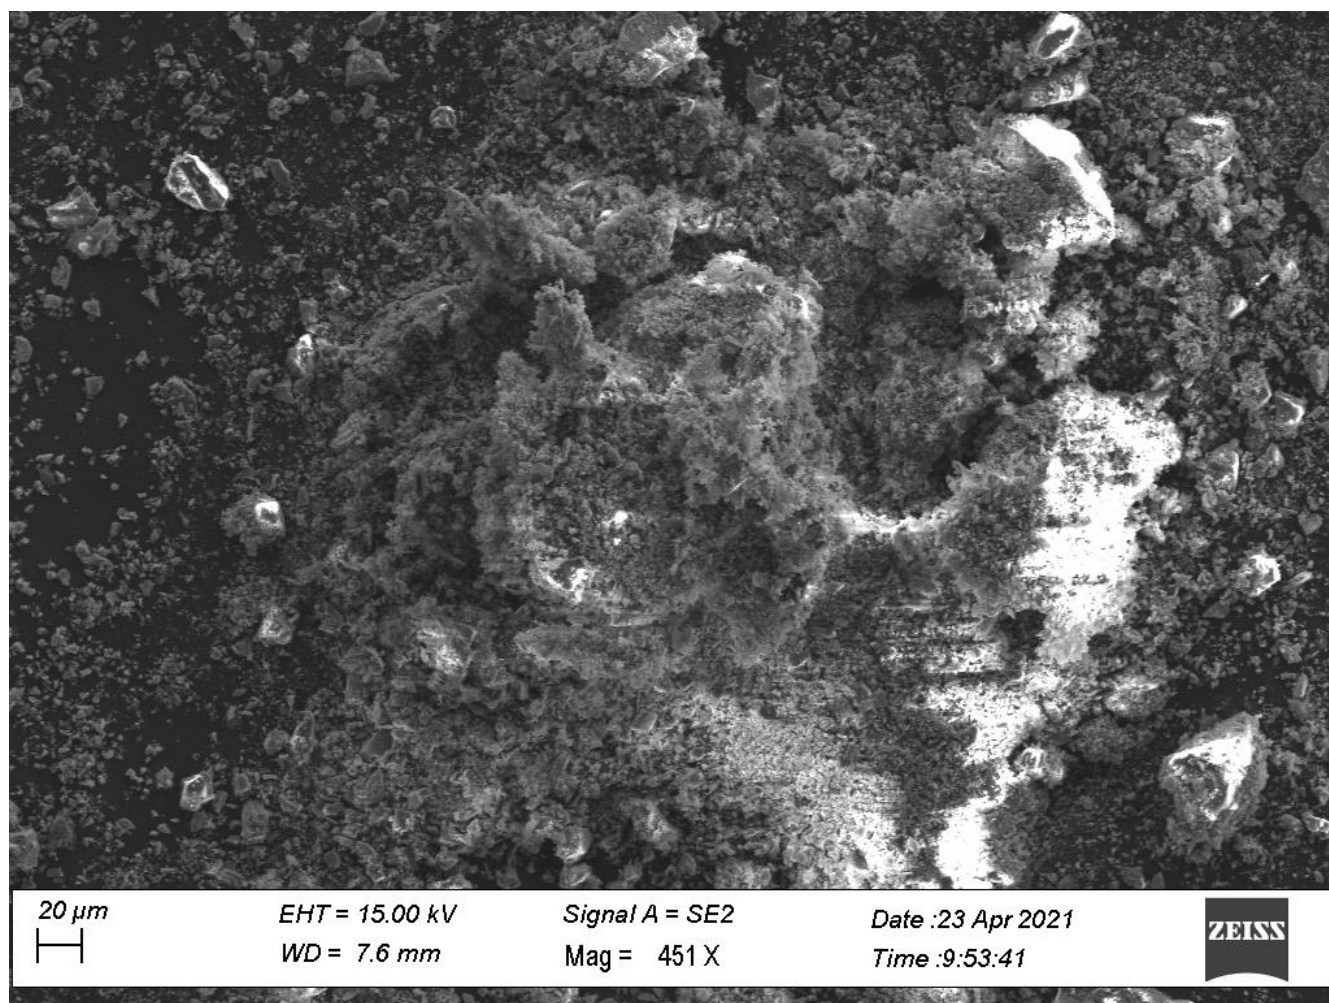

*Figure S8. SEM image 20  $\mu\text{m}$  of catalyst 1 after third cycle*

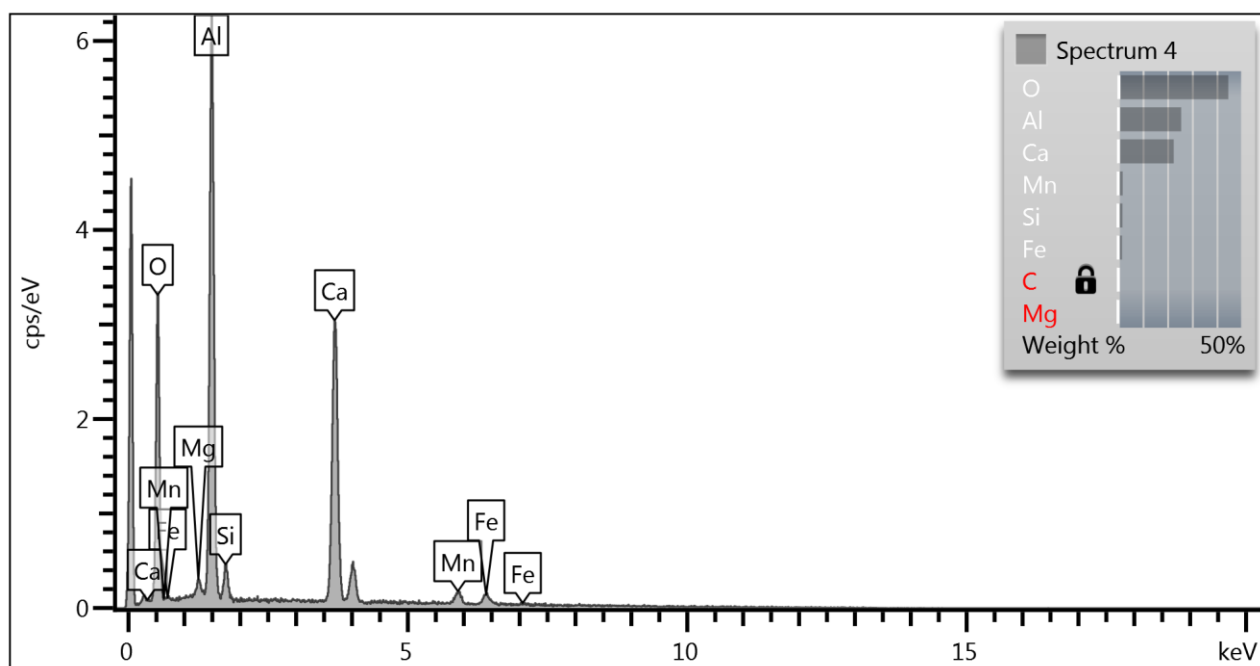

| Element | Wt%    | Wt% Sigma |
|---------|--------|-----------|
| C       | 0.72   | 0.17      |
| O       | 44.79  | 0.42      |
| Mg      | 0.65   | 0.08      |
| Al      | 25.67  | 0.27      |
| Si      | 1.84   | 0.10      |
| Ca      | 22.66  | 0.26      |
| Mn      | 1.96   | 0.14      |
| Fe      | 1.70   | 0.14      |
| Total:  | 100.00 |           |

Figure S9. EDX analysis of catalyst **1** after first cycle.

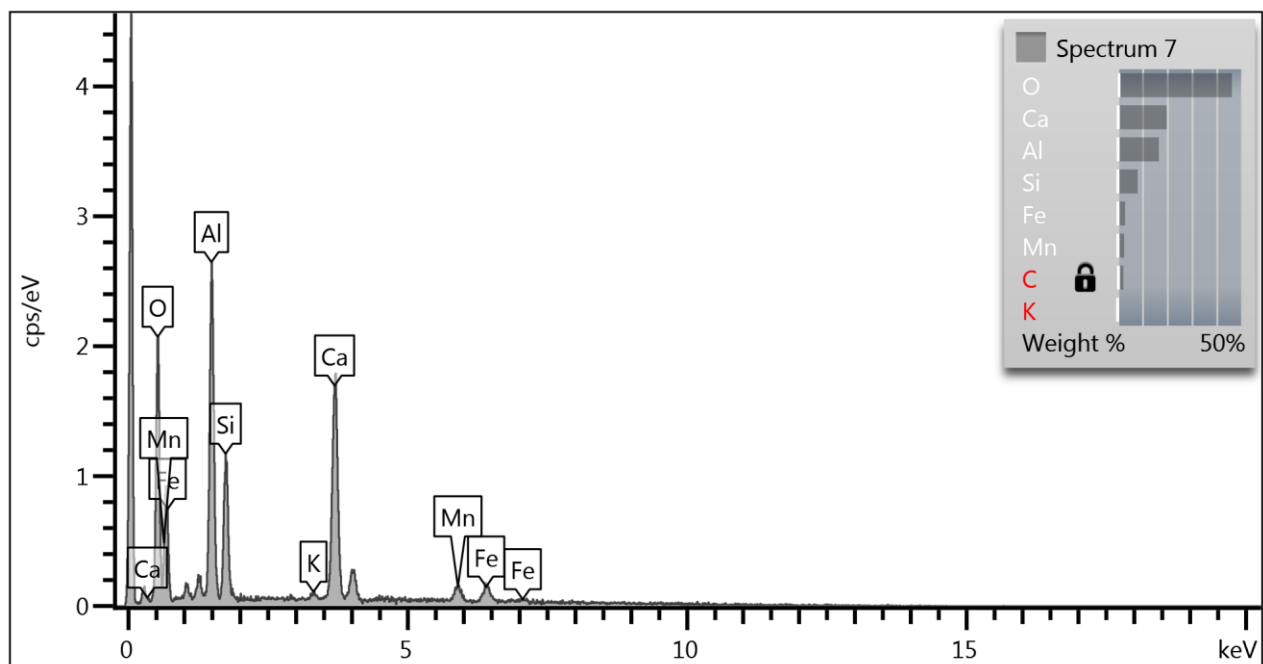

| Element | Wt%    | Wt% Sigma |
|---------|--------|-----------|
| C       | 2.41   | 0.46      |
| O       | 46.28  | 0.66      |
| Al      | 16.76  | 0.33      |
| Si      | 8.22   | 0.24      |
| K       | 0.50   | 0.11      |
| Ca      | 19.95  | 0.38      |
| Mn      | 2.76   | 0.25      |
| Fe      | 3.13   | 0.26      |
| Total:  | 100.00 |           |

Figure S10. EDX analysis of catalyst **1** after 2<sup>nd</sup> cycle.

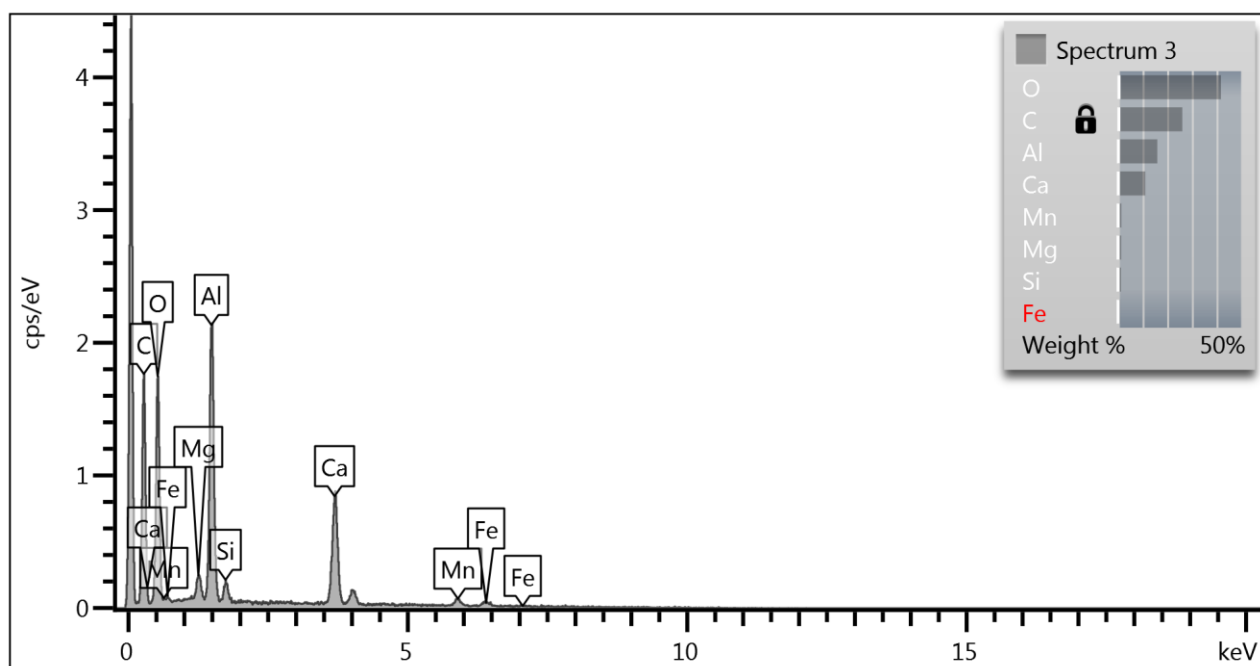

| Element | Wt%    | Wt% Sigma |
|---------|--------|-----------|
| C       | 26.14  | 0.40      |
| O       | 41.81  | 0.48      |
| Mg      | 1.34   | 0.09      |
| Al      | 16.00  | 0.22      |
| Si      | 1.27   | 0.09      |
| Ca      | 11.13  | 0.19      |
| Mn      | 1.40   | 0.13      |
| Fe      | 0.91   | 0.12      |
| Total:  | 100.00 |           |

Figure S11. EDX analysis of catalyst **1** after 3<sup>rd</sup> cycle.

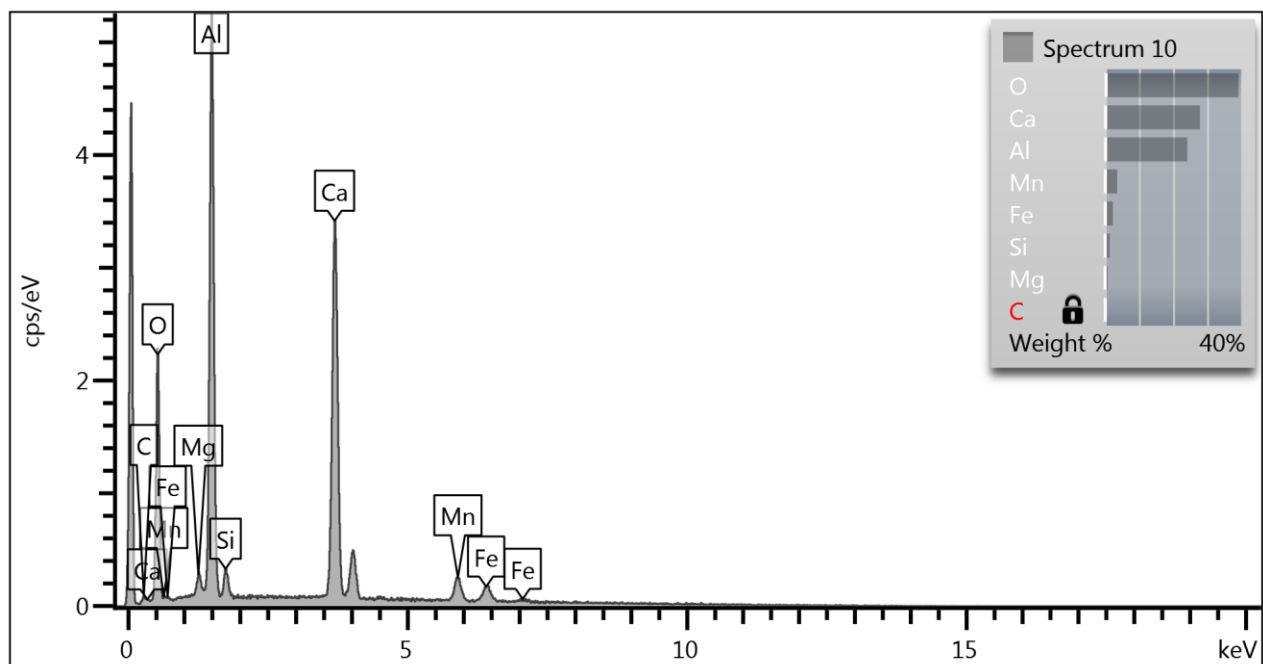

| Element | Wt%    | Wt% Sigma |
|---------|--------|-----------|
| C       | 0.52   | 0.11      |
| O       | 39.25  | 0.35      |
| Mg      | 0.84   | 0.06      |
| Al      | 24.16  | 0.20      |
| Si      | 1.41   | 0.07      |
| Ca      | 27.90  | 0.23      |
| Mn      | 3.60   | 0.14      |
| Fe      | 2.32   | 0.13      |
| Total:  | 100.00 |           |

Figure S12. EDX analysis of pristine catalyst **1** after thermal treatment (400°C).

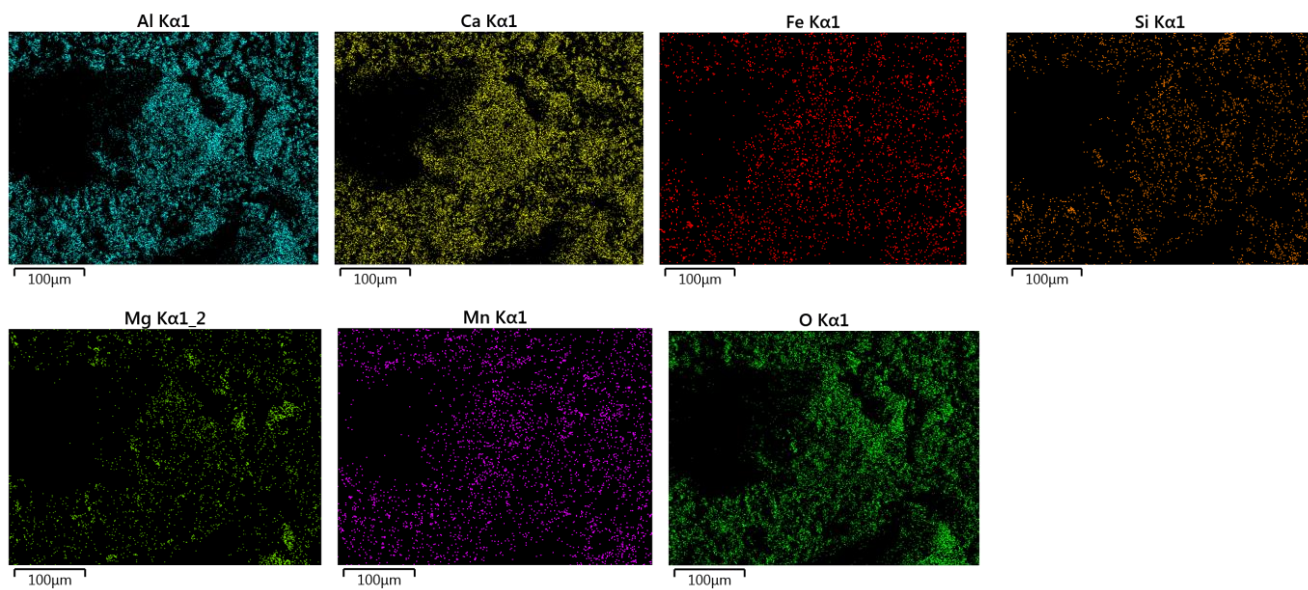

Figure S13. Mapping of pristine catalyst **1**.

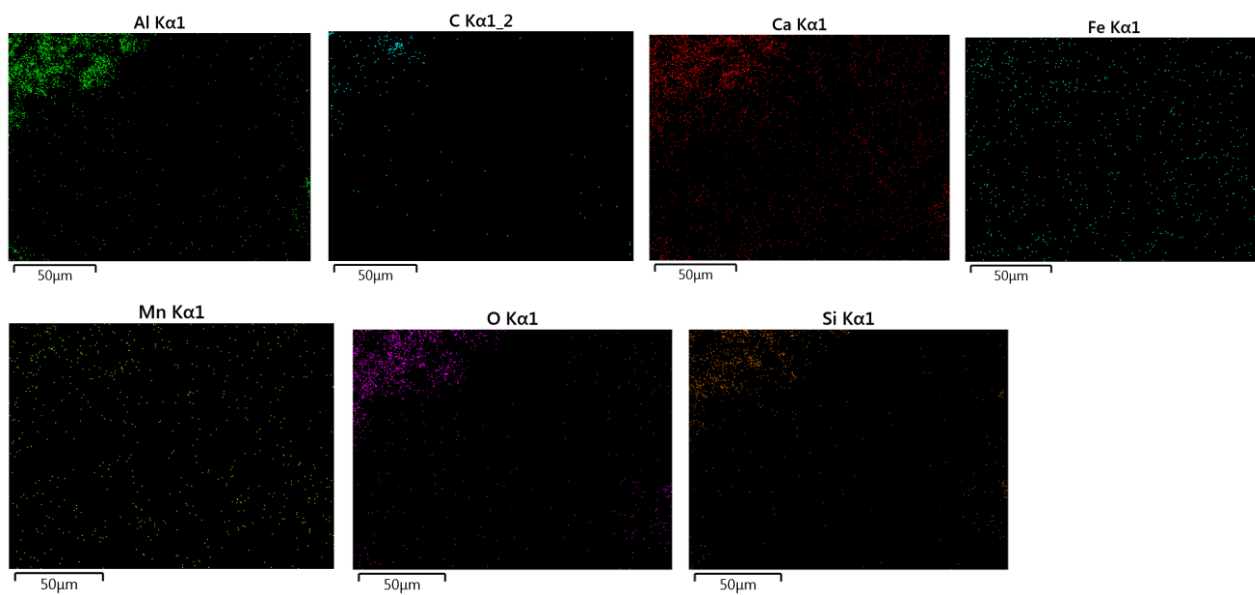

Figure S14. Mapping of catalyst **1** after 1<sup>st</sup> cycle.

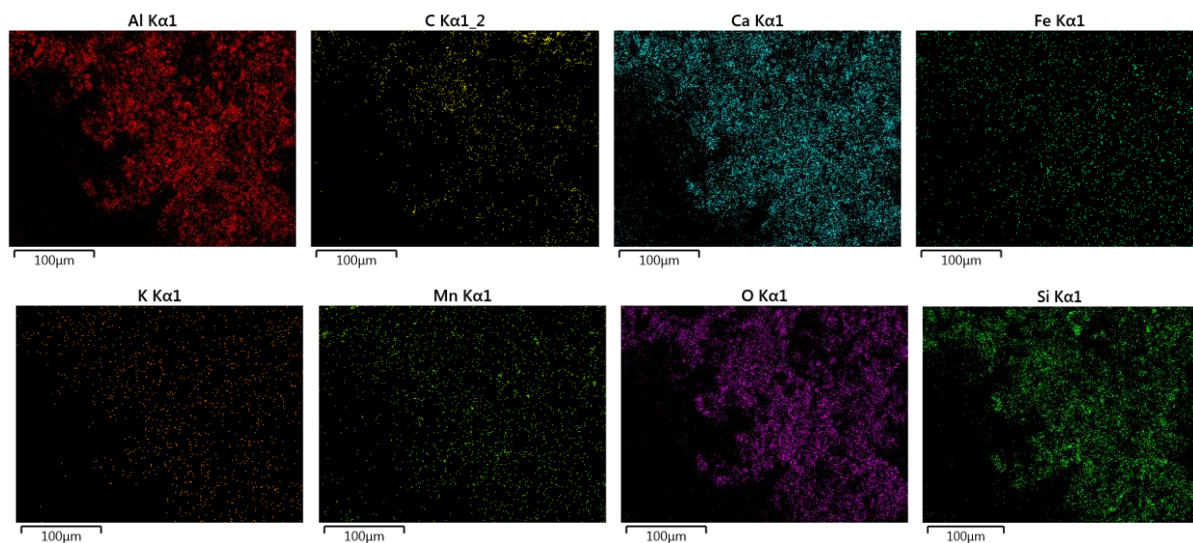

*Figure S15. Mapping of catalyst 1 after second cycle.*

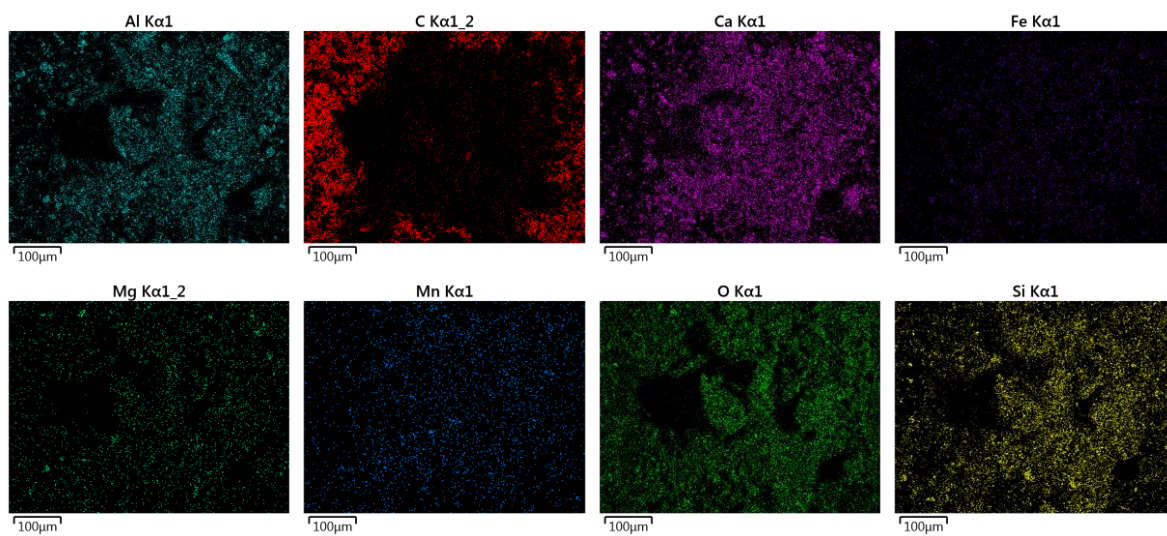

*Figure S16. Mapping of catalyst 1 after third cycle.*

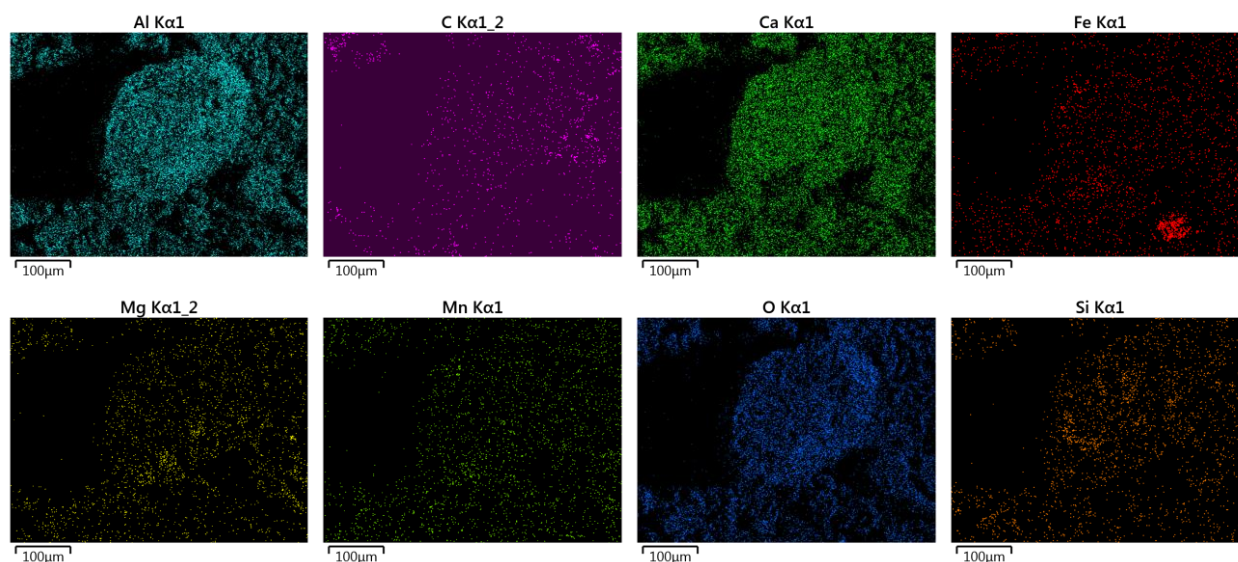

*Figure S17. Mapping of catalyst **1** after fourth cycle.*

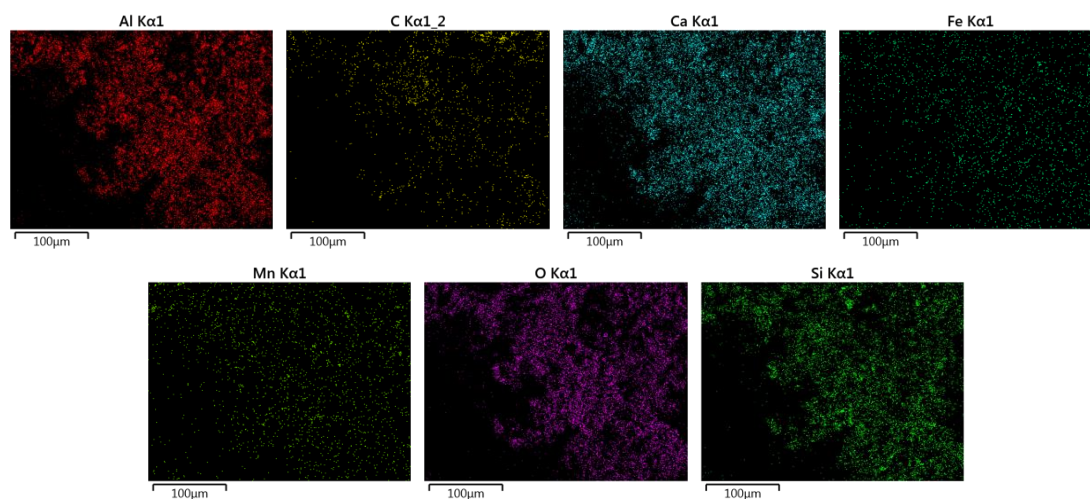

*Figure S18. Mapping of catalyst **1** after fourth cycle and after thermal treatment (400°C).*

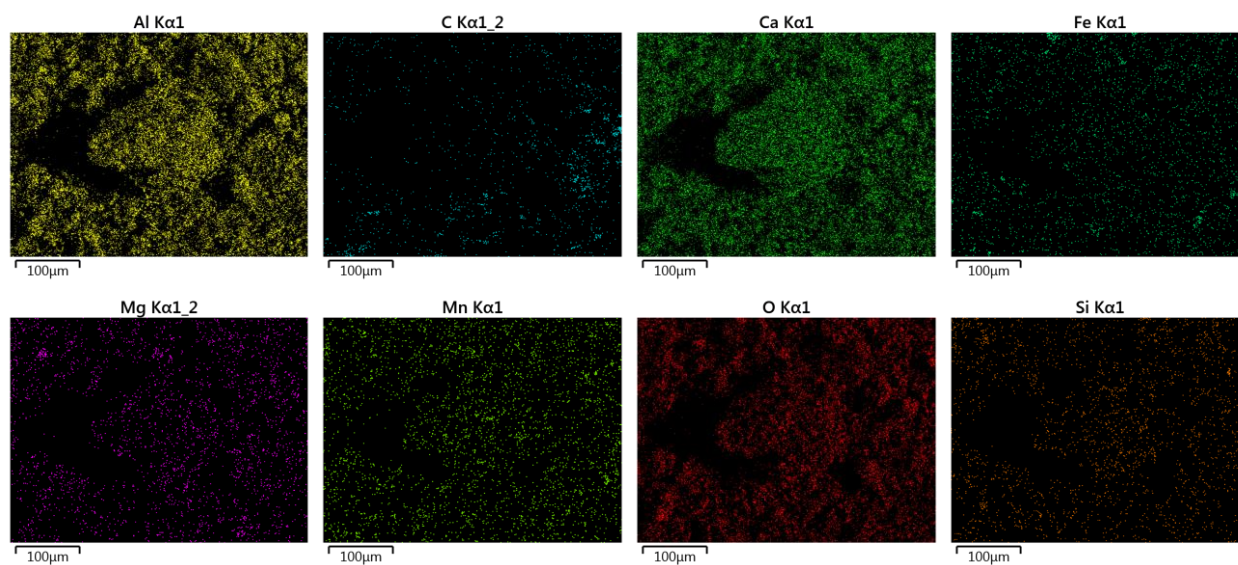

*Figure S19. Mapping of pristine catalyst 1 after thermal treatment (400°C).*
